# Supplementary material for: De Novo Transcriptome Sequence Assembly and Identification of AP2/ERF Transcription Factor Related to Abiotic Stress in Parsley (Petroselinum crispum)
Source: PLoS One. 2014 Sep 30;9(9):e108977. doi: 10.1371/journal.pone.0108977 (PMC4182582; doi:10.1371/journal.pone.0108977)
Supplement: Table S3 — Gene list in each family of transcription factors. (XLS) [file pone.0108977.s004.xls]

## Sheet: Sheet1
Table S3. Gene list in each family of transcription factors.
Transcription factor family	Gene ID
ABI3-VP1	Pc11611
	Pc13772
	Pc15657
	Pc17417
	Pc17668
	Pc19325
	Pc19618
	Pc20767
	Pc26067
	Pc27730
	Pc28641
	Pc30404
	Pc31607
	Pc32563
	Pc32855
	Pc34530
	Pc35141
	Pc35315
	Pc35380
	Pc36591
	Pc37218
	Pc37240
	Pc37950
	Pc39256
	Pc39516
	Pc39916
	Pc39951
	Pc40736
	Pc41411
	Pc41828
	Pc44970
	Pc7270
	Pc8402
	Pc8403
	Pc9183
AP2-ERF	Pc5330
	Pc32997
	Pc27370
	Pc40979
	Pc32872
	Pc16584
	Pc8636
	Pc3864
	Pc5475
	Pc25372
	Pc15729
	Pc17991
	Pc35010
	Pc45864
	Pc44862
	Pc36593
	Pc25233
	Pc29844
	Pc31652
	Pc27321
	Pc9963
	Pc43775
	Pc26528
	Pc17873
	Pc22233
	Pc34490
	Pc30932
	Pc22831
	Pc16943
	Pc22322
	Pc28206
	Pc27248
	Pc39638
	Pc9625
	Pc2010
	Pc28502
	Pc4011
	Pc15275
	Pc40265
	Pc41893
	Pc37323
	Pc5699
	Pc1245
	Pc36911
	Pc44053
	Pc14802
	Pc16182
	Pc45652
	Pc3133
	Pc24931
	Pc46495
	Pc46264
	Pc16765
	Pc5606
	Pc20663
	Pc26431
	Pc29763
	Pc3572
	Pc17565
	Pc36149
	Pc36051
	Pc43801
	Pc27840
	Pc29532
	Pc3537
	Pc15997
	Pc8203
	Pc28978
	Pc33331
	Pc37218
	Pc15188
	Pc38419
	Pc46769
	Pc14646
	Pc15401
	Pc26165
	Pc49395
	Pc25448
	Pc8093
	Pc18845
	Pc46484
	Pc11611
	Pc21305
	Pc12531
	Pc27101
	Pc12516
	Pc15400
	Pc36171
ARF	Pc39256
	Pc41411
	Pc37950
	Pc39916
	Pc34530
	Pc9183
	Pc31607
	Pc39951
	Pc32855
	Pc35380
	Pc17417
	Pc26310
	Pc6993
	Pc24993
ARID	Pc15251
	Pc36809
	Pc29143
	Pc32005
	Pc30756
	Pc16607
	Pc32722
	Pc11047
AS2	Pc26568
	Pc15998
	Pc21171
	Pc36049
	Pc48107
	Pc3529
	Pc1504
	Pc9981
	Pc2800
	Pc34029
	Pc35658
	Pc4308
	Pc17324
	Pc17999
	Pc28145
AUX-IAA	Pc17115
	Pc43155
	Pc17034
	Pc28937
	Pc34389
	Pc43551
	Pc30042
	Pc37504
	Pc17356
	Pc38737
	Pc43044
	Pc4496
	Pc29804
	Pc27963
	Pc36042
	Pc45226
	Pc44932
	Pc17417
	Pc3929
	Pc41063
	Pc35380
	Pc37503
	Pc31607
	Pc16731
	Pc36043
	Pc39258
	Pc39916
	Pc41411
	Pc39951
	Pc37951
	Pc27962
	Pc6355
	Pc18048
	Pc11876
	Pc19053
	Pc37505
	Pc32855
	Pc34390
	Pc27084
	Pc48988
	Pc34530
	Pc22919
	Pc16935
	Pc27085
	Pc1836
	Pc40524
BBR-BPC	Pc10203
	Pc28722
	Pc5060
	Pc18301
	Pc33538
	Pc35427
	Pc29374
	Pc28715
	Pc3986
BES1	Pc40763
	Pc41109
	Pc37917
bHLH	Pc16445
	Pc3666
	Pc22338
	Pc17474
	Pc40300
	Pc35050
	Pc11433
	Pc38611
	Pc45401
	Pc22072
	Pc24902
	Pc29164
	Pc38626
	Pc7692
	Pc15221
	Pc41674
	Pc28467
	Pc28046
	Pc34786
	Pc11521
	Pc46274
	Pc15493
	Pc10252
	Pc32711
	Pc28957
	Pc43076
	Pc29380
	Pc32437
	Pc15542
	Pc47457
	Pc43622
	Pc5107
	Pc47618
	Pc38310
	Pc4673
	Pc21624
	Pc1221
	Pc34650
	Pc15144
	Pc26838
	Pc43506
	Pc42514
	Pc29338
	Pc6185
	Pc32592
	Pc26951
	Pc24938
	Pc33948
	Pc45740
	Pc17217
	Pc38920
	Pc36173
	Pc34825
	Pc33153
	Pc28729
	Pc41997
	Pc39955
	Pc17235
	Pc29044
	Pc31372
	Pc29378
	Pc47778
	Pc34070
	Pc26823
	Pc41285
	Pc35265
	Pc46777
	Pc9280
	Pc24956
	Pc41429
	Pc27560
	Pc29389
	Pc36969
	Pc37022
	Pc34382
	Pc27342
	Pc8350
	Pc14076
	Pc44567
	Pc34729
	Pc17279
	Pc32322
	Pc40192
	Pc3672
	Pc3917
	Pc33327
	Pc14264
	Pc26207
	Pc26622
	Pc34679
bZIP	Pc16899
	Pc23789
	Pc31871
	Pc38108
	Pc49091
	Pc26478
	Pc24880
	Pc28826
	Pc3964
	Pc17452
	Pc12658
	Pc33631
	Pc28099
	Pc16945
	Pc40751
	Pc42742
	Pc38254
	Pc15900
	Pc36503
	Pc33174
	Pc47818
	Pc45523
	Pc45748
	Pc36086
	Pc37470
	Pc25049
	Pc39508
	Pc39552
	Pc31319
	Pc38988
	Pc37720
	Pc35641
	Pc29244
	Pc43369
	Pc17340
	Pc44093
	Pc35201
	Pc34329
	Pc5561
	Pc39526
	Pc35408
	Pc40243
	Pc39689
	Pc39038
	Pc7788
	Pc46971
	Pc29519
	Pc13534
	Pc4315
	Pc6185
	Pc20842
	Pc26715
	Pc946
	Pc33318
	Pc37446
	Pc33807
	Pc27117
	Pc21674
	Pc36530
	Pc17799
	Pc2461
	Pc25056
	Pc45662
	Pc32830
	Pc33532
	Pc48879
	Pc33891
	Pc18938
	Pc37798
	Pc31687
	Pc34780
	Pc33769
	Pc42928
	Pc6278
	Pc1221
	Pc10926
	Pc24938
	Pc43622
	Pc36429
C2C2-CO-like	Pc42870
	Pc17532
	Pc33546
	Pc4091
	Pc17048
	Pc17350
	Pc33066
	Pc46525
	Pc28829
	Pc41896
	Pc37178
	Pc34193
	Pc38066
	Pc14946
	Pc27980
	Pc43808
	Pc13518
	Pc34046
	Pc28866
	Pc37472
	Pc36304
	Pc39419
	Pc11755
	Pc33928
	Pc17571
	Pc16219
	Pc16947
	Pc27275
	Pc42617
	Pc28926
	Pc40318
	Pc41681
C2H2	Pc25762
	Pc37749
	Pc38998
	Pc10918
	Pc41688
	Pc31259
	Pc5895
	Pc26894
	Pc5214
	Pc36471
	Pc38816
	Pc33829
	Pc6759
	Pc37982
	Pc25961
	Pc49936
	Pc41187
	Pc28278
	Pc30185
	Pc49242
	Pc33662
	Pc9033
	Pc13937
	Pc31085
	Pc25273
	Pc26057
	Pc32522
	Pc7329
	Pc6803
	Pc39120
	Pc955
	Pc33603
	Pc26125
	Pc40064
	Pc8628
	Pc28221
	Pc27679
	Pc41214
	Pc40816
	Pc43554
	Pc6879
	Pc29777
	Pc46246
	Pc37166
	Pc28279
	Pc12511
	Pc42356
	Pc30361
	Pc33217
	Pc34036
	Pc34454
	Pc27068
	Pc26791
	Pc18206
	Pc23692
	Pc12714
	Pc36472
	Pc16998
	Pc5585
	Pc28780
	Pc34538
	Pc3228
	Pc3911
C3H	Pc6249
	Pc18112
	Pc39989
	Pc11955
	Pc32466
	Pc17850
	Pc38143
	Pc38996
	Pc30581
	Pc17533
	Pc25737
	Pc41076
	Pc19637
	Pc33184
	Pc16377
	Pc27452
	Pc17528
	Pc43818
	Pc40708
	Pc16258
	Pc13024
	Pc5787
	Pc30582
	Pc44034
	Pc16838
	Pc16060
	Pc32098
	Pc38326
	Pc22157
	Pc37216
	Pc30996
	Pc31726
	Pc40501
	Pc34030
	Pc39277
	Pc41668
	Pc40266
	Pc48424
	Pc41823
	Pc34969
	Pc40857
	Pc43937
	Pc28968
	Pc28420
	Pc35809
	Pc44121
	Pc38324
	Pc30167
	Pc17436
	Pc29439
	Pc29362
	Pc43315
	Pc24599
	Pc8348
	Pc31161
	Pc14951
	Pc37352
	Pc35562
	Pc39386
	Pc29238
	Pc43757
	Pc15906
	Pc5983
	Pc42738
	Pc1402
	Pc41865
	Pc24104
CAMTA	Pc35986
	Pc40383
	Pc38304
	Pc39164
CPP	Pc38183
	Pc35877
	Pc32197
	Pc35414
	Pc21374
	Pc24785
	Pc25205
	Pc43887
Dof	Pc25620
	Pc22475
	Pc36877
	Pc14510
	Pc14806
	Pc43491
	Pc37551
	Pc36132
	Pc28313
	Pc29168
	Pc23620
	Pc24103
	Pc8923
	Pc30031
	Pc35531
	Pc13950
	Pc46633
	Pc17900
	Pc29410
	Pc35790
	Pc35789
	Pc9262
	Pc28314
	Pc33928
	Pc40330
	Pc21786
	Pc47789
	Pc36304
	Pc28117
E2F-DP	Pc31455
	Pc14223
	Pc24911
	Pc33116
	Pc30162
	Pc47358
	Pc29980
	Pc14222
EIL	Pc5883
	Pc42550
	Pc31224
	Pc15829
	Pc7318
FAR1	Pc35458
	Pc2759
	Pc27535
	Pc16753
	Pc35842
	Pc25195
	Pc32328
	Pc21130
	Pc15131
	Pc47517
	Pc31777
	Pc17665
	Pc29513
	Pc8247
	Pc32384
	Pc21914
	Pc27764
	Pc35319
	Pc21642
	Pc19876
	Pc35293
	Pc14416
	Pc40346
	Pc23697
FHA	Pc24697
	Pc37750
	Pc43888
	Pc1186
	Pc41284
	Pc14596
	Pc28565
	Pc43395
	Pc33706
	Pc4414
	Pc25029
	Pc39179
	Pc27327
	Pc25866
	Pc26223
	Pc33406
GARP-ARR-B	Pc40083
	Pc24924
	Pc32260
	Pc33066
	Pc40088
	Pc34887
	Pc34193
	Pc29250
	Pc40744
	Pc32753
	Pc16327
	Pc5907
	Pc27980
	Pc13643
	Pc41681
	Pc31524
	Pc34325
	Pc15967
	Pc38066
	Pc23676
	Pc1515
	Pc24339
	Pc1394
	Pc8820
	Pc19265
	Pc43614
	Pc40384
	Pc33907
	Pc6798
	Pc17353
	Pc33908
	Pc28877
GATA	Pc14550
	Pc30535
	Pc8699
	Pc43795
	Pc17337
	Pc32381
	Pc17468
	Pc9327
	Pc35249
	Pc42272
	Pc4257
	Pc10692
	Pc29230
	Pc45022
	Pc3573
	Pc36372
	Pc1898
	Pc45569
	Pc33928
	Pc28096
	Pc42240
	Pc43808
	Pc36843
	Pc36304
	Pc25428
	Pc34498
	Pc8899
	Pc32563
GeBP	Pc41404
	Pc42816
	Pc42962
	Pc32366
	Pc16116
	Pc25470
	Pc28670
	Pc33605
	Pc25104
	Pc29530
	Pc32367
	Pc4119
	Pc38469
	Pc44840
	Pc37334
	Pc24648
GIF	Pc43517
	Pc44313
	Pc2925
	Pc34582
	Pc30500
	Pc35190
GRAS	Pc29886
	Pc6093
	Pc40564
	Pc29830
	Pc15143
	Pc5980
	Pc47584
	Pc5886
	Pc40127
	Pc28079
	Pc40404
	Pc34168
	Pc8139
	Pc37256
	Pc36050
	Pc44249
	Pc32799
	Pc34568
	Pc41999
	Pc39356
	Pc31217
	Pc30087
	Pc33981
	Pc33982
	Pc17694
	Pc15044
	Pc15939
	Pc17695
	Pc23242
	Pc30086
	Pc5289
	Pc23016
	Pc27509
	Pc4370
	Pc7841
	Pc23970
	Pc40779
	Pc15042
	Pc22741
	Pc46190
	Pc24014
GRF	Pc38594
	Pc43572
	Pc18151
	Pc20798
	Pc20160
	Pc39371
	Pc36208
HMG	Pc25911
	Pc32696
	Pc35623
	Pc17075
	Pc14296
	Pc34015
	Pc38867
	Pc42897
	Pc1445
	Pc39675
	Pc39741
	Pc9505
	Pc35501
	Pc45383
	Pc29929
	Pc28980
	Pc50019
	Pc31529
	Pc27195
	Pc42715
	Pc17647
	Pc47008
	Pc26665
	Pc32684
	Pc26184
HSF	Pc37730
	Pc37446
	Pc43670
	Pc30465
	Pc4930
	Pc24594
	Pc18157
	Pc36429
	Pc31609
	Pc24593
	Pc22056
	Pc1121
	Pc49638
	Pc38729
JUMONJ	Pc32070
	Pc23001
	Pc32006
	Pc41187
	Pc33070
	Pc39174
	Pc39268
	Pc22737
	Pc39007
	Pc24388
	Pc27591
	Pc4666
	Pc40672
	Pc32679
	Pc37915
	Pc23326
	Pc39296
	Pc36493
	Pc38170
	Pc3664
	Pc4698
	Pc35929
LFY	Pc18297
	Pc41292
LIM	Pc42991
	Pc28861
	Pc42456
	Pc32523
	Pc44801
	Pc29402
	Pc2620
	Pc28365
	Pc27068
	Pc34672
	Pc34776
	Pc45449
LSD	Pc29211
	Pc25081
	Pc39198
	Pc38613
	Pc30004
	Pc45015
	Pc15027
	Pc11537
	Pc41074
	Pc44407
	Pc15586
	Pc15952
MADS	Pc12816
	Pc34731
	Pc27884
	Pc18186
	Pc15719
	Pc42548
	Pc43686
	Pc30775
	Pc18333
	Pc3366
	Pc1786
	Pc11687
	Pc34096
	Pc15784
	Pc18320
	Pc8063
	Pc449
	Pc23048
	Pc14030
MBF1	Pc15425
	Pc43039
	Pc17157
	Pc31664
MYB	Pc36380
	Pc13523
	Pc4192
	Pc42862
	Pc29499
	Pc37948
	Pc30195
	Pc28191
	Pc33225
	Pc2743
	Pc23718
	Pc27713
	Pc45912
	Pc48808
	Pc45419
	Pc34220
	Pc18676
	Pc32044
	Pc16152
	Pc10991
	Pc26679
	Pc48387
	Pc28367
	Pc27655
	Pc30118
	Pc14979
	Pc38577
	Pc50042
	Pc46478
	Pc17666
	Pc22062
	Pc50024
	Pc31176
	Pc30547
	Pc41460
	Pc25971
	Pc8398
	Pc12467
	Pc28234
	Pc42540
	Pc30577
	Pc1662
	Pc5039
	Pc37789
	Pc37375
	Pc31612
	Pc47433
	Pc30666
	Pc5710
	Pc16582
	Pc33558
	Pc36294
	Pc30827
	Pc12143
	Pc25399
	Pc17367
	Pc34722
	Pc32299
	Pc10085
	Pc39727
	Pc44615
	Pc24760
	Pc15031
	Pc21007
	Pc36692
	Pc42047
	Pc24261
	Pc39328
	Pc26968
	Pc17434
	Pc38230
	Pc24762
	Pc25433
	Pc33421
	Pc13387
	Pc38741
	Pc8613
	Pc18255
	Pc29366
	Pc36263
	Pc47185
	Pc32447
	Pc18677
	Pc34058
	Pc17353
	Pc7339
	Pc8609
	Pc4909
	Pc40482
	Pc48276
	Pc36131
	Pc16982
	Pc29250
	Pc16264
	Pc39286
	Pc20722
	Pc32260
	Pc11226
	Pc36824
	Pc23668
	Pc24924
	Pc33057
	Pc41069
	Pc29084
	Pc43274
	Pc39811
	Pc31524
	Pc27822
	Pc45913
	Pc36067
	Pc23857
	Pc36207
	Pc45299
	Pc6798
	Pc36175
	Pc29232
	Pc38016
	Pc41922
	Pc32329
	Pc25850
	Pc46331
	Pc47317
	Pc12561
	Pc31166
	Pc39474
	Pc17796
	Pc39124
	Pc43210
	Pc37155
	Pc38321
	Pc28491
	Pc40556
	Pc23670
	Pc18286
	Pc7721
	Pc246
	Pc34038
	Pc36081
	Pc35920
	Pc24765
	Pc41517
	Pc32735
	Pc41456
	Pc39637
	Pc32874
	Pc29637
	Pc49485
	Pc28511
	Pc2656
	Pc15901
	Pc33949
	Pc12343
	Pc38469
	Pc19736
	Pc26899
	Pc21594
	Pc41260
	Pc41469
	Pc28572
	Pc41952
	Pc23144
	Pc4088
	Pc8371
	Pc41500
	Pc41810
	Pc34888
	Pc36687
	Pc27453
	Pc49976
	Pc21101
	Pc41748
	Pc34533
NAC	Pc5858
	Pc37947
	Pc48650
	Pc29654
	Pc1761
	Pc28185
	Pc45708
	Pc39877
NF-X1	Pc40925
	Pc41853
	Pc18787
NF-YA	Pc44605
	Pc37147
	Pc36156
	Pc9849
	Pc24814
	Pc10760
	Pc33527
	Pc49542
	Pc4371
NF-YB	Pc44209
	Pc44746
	Pc39076
	Pc25466
	Pc5497
	Pc26012
	Pc31748
	Pc42543
	Pc49101
	Pc29383
	Pc31961
	Pc11114
	Pc6071
	Pc32067
	Pc37663
	Pc35490
	Pc38692
	Pc39119
	Pc44473
	Pc14235
	Pc2652
	Pc13582
	Pc11320
	Pc17041
	Pc4387
	Pc108
	Pc42482
	Pc47964
	Pc26031
	Pc41542
	Pc42221
	Pc17447
	Pc42341
	Pc42209
	Pc39834
	Pc32813
	Pc8104
	Pc28481
	Pc3793
	Pc4536
	Pc1774
	Pc27256
	Pc4994
	Pc28048
	Pc40954
	Pc32066
	Pc27039
	Pc28776
	Pc17773
	Pc41087
	Pc18507
	Pc36389
	Pc12114
	Pc15103
	Pc46655
	Pc28731
	Pc36022
	Pc39459
Nin-like	Pc39279
	Pc32547
	Pc39979
	Pc21308
	Pc40524
	Pc36911
	Pc39314
	Pc49667
	Pc21316
	Pc2599
	Pc2631
NZZ-SPL	Pc30715
PcG	Pc34781
	Pc25393
	Pc40148
	Pc39801
	Pc5928
	Pc37112
	Pc37635
	Pc29024
	Pc5105
	Pc28588
	Pc29306
	Pc42085
	Pc37781
	Pc31824
	Pc37479
	Pc13769
	Pc44538
	Pc6237
	Pc25205
	Pc24785
	Pc29221
	Pc24572
	Pc36755
	Pc38830
	Pc41150
	Pc38441
	Pc30105
	Pc46388
	Pc27424
	Pc43957
	Pc23865
	Pc34421
	Pc26932
	Pc41802
	Pc36869
	Pc19160
	Pc35207
	Pc25000
	Pc14795
	Pc16654
	Pc31346
	Pc40124
	Pc24571
	Pc7368
PHD	Pc17502
	Pc32673
	Pc27219
	Pc42140
	Pc40847
	Pc42085
	Pc41273
	Pc27870
	Pc35564
	Pc28423
	Pc30415
	Pc38457
	Pc42145
	Pc39612
	Pc16654
	Pc42188
	Pc32005
	Pc4813
	Pc40998
	Pc37832
	Pc35436
	Pc30343
	Pc37529
	Pc37535
	Pc36284
	Pc41500
	Pc33780
	Pc43405
	Pc27589
	Pc43915
	Pc28503
	Pc34870
	Pc16632
	Pc27843
	Pc26603
	Pc33865
	Pc39982
	Pc40459
	Pc30381
	Pc39359
	Pc30658
	Pc29623
	Pc39790
	Pc10540
	Pc36271
	Pc18043
	Pc16650
	Pc5776
	Pc22209
	Pc39176
	Pc46229
	Pc27818
	Pc41802
	Pc42044
	Pc35341
	Pc27784
	Pc41123
	Pc29689
	Pc27928
	Pc41984
	Pc16548
	Pc35110
	Pc38321
	Pc32101
	Pc6669
	Pc36971
	Pc23064
	Pc48638
	Pc2629
	Pc8768
	Pc48054
	Pc11766
	Pc39578
	Pc16607
	Pc30664
	Pc19255
	Pc15818
	Pc34832
	Pc37771
	Pc22506
	Pc39934
	Pc30931
	Pc18842
	Pc36567
	Pc41119
	Pc34087
	Pc40719
	Pc3519
	Pc33105
	Pc39515
	Pc9759
	Pc7440
	Pc47571
	Pc41101
	Pc37102
	Pc14155
	Pc5386
	Pc32266
	Pc35586
	Pc30082
	Pc28623
	Pc41680
	Pc40839
	Pc32409
	Pc15339
	Pc28939
	Pc41082
	Pc49565
	Pc41603
	Pc10664
	Pc1701
	Pc41531
	Pc34163
	Pc32102
	Pc12631
	Pc31733
	Pc49563
	Pc35966
	Pc18325
	Pc28337
	Pc25827
	Pc45449
	Pc34102
	Pc37551
	Pc36024
	Pc43840
	Pc20194
	Pc23802
	Pc38685
	Pc49154
	Pc41815
	Pc39572
	Pc39779
	Pc27833
	Pc1657
	Pc14768
	Pc7094
	Pc37601
	Pc37491
	Pc183
	Pc16500
	Pc18086
	Pc33939
	Pc16171
	Pc17234
	Pc17707
	Pc32484
	Pc35311
	Pc27076
	Pc35666
	Pc47574
	Pc13890
	Pc23239
	Pc39364
	Pc43976
	Pc25165
	Pc13682
PLATZ	Pc26374
	Pc34675
	Pc34062
	Pc46859
	Pc46342
	Pc2191
	Pc10491
S1Fa-like	Pc4919
	Pc32125
	Pc38396
	Pc34107
	Pc31011
	Pc22797
SAP	Pc37461
	Pc38668
	Pc36624
	Pc28060
	Pc39359
	Pc37230
	Pc2323
	Pc28126
	Pc22550
	Pc4134
	Pc35022
	Pc36230
	Pc17832
SBP	Pc24373
	Pc17959
	Pc29133
	Pc27345
	Pc31492
	Pc35900
	Pc41978
	Pc43300
	Pc31466
	Pc16178
	Pc29335
	Pc23826
	Pc27564
	Pc29154
	Pc17378
SRS	Pc29290
	Pc27825
	Pc27458
	Pc18504
	Pc24543
	Pc13241
	Pc39595
TALE	Pc34264
	Pc7494
	Pc33251
	Pc33278
	Pc27926
	Pc28387
	Pc25375
	Pc32647
	Pc28333
	Pc34631
	Pc40295
	Pc34285
TAZ	Pc32932
	Pc32926
	Pc11772
	Pc16323
	Pc14842
	Pc35214
	Pc34105
TCP	Pc34900
	Pc43361
	Pc25856
	Pc16186
	Pc38123
	Pc38802
	Pc25652
	Pc27246
	Pc15369
	Pc40420
	Pc47602
	Pc40157
	Pc44843
	Pc33851
	Pc35402
	Pc47822
	Pc15644
	Pc47067
	Pc7821
	Pc23406
	Pc31911
	Pc15643
Trihelix	Pc39637
	Pc40556
	Pc17412
	Pc28872
	Pc21101
	Pc28572
	Pc35348
	Pc24951
	Pc33949
	Pc34533
	Pc38469
	Pc37334
	Pc33028
	Pc25101
	Pc41260
	Pc4119
	Pc36940
	Pc41307
	Pc26889
	Pc38413
	Pc32968
	Pc34038
	Pc30296
	Pc8371
	Pc30295
	Pc41952
	Pc15163
	Pc46078
	Pc34532
	Pc28491
	Pc17683
	Pc25850
	Pc43751
	Pc31527
	Pc26899
	Pc39124
	Pc29232
	Pc18286
	Pc4909
	Pc17796
	Pc30547
	Pc39111
Tub	Pc43851
	Pc14343
	Pc34865
	Pc33136
	Pc27767
	Pc16562
	Pc3838
	Pc34125
	Pc22236
	Pc46112
	Pc11280
	Pc38118
	Pc803
	Pc31712
Whirly	Pc29038
	Pc36365
WRKY	Pc39766
	Pc35293
	Pc37476
	Pc27764
	Pc27891
	Pc3599
	Pc40346
	Pc32310
	Pc33334
	Pc7615
	Pc2535
	Pc6066
	Pc33354
	Pc25350
	Pc4537
	Pc18195
	Pc601
	Pc23697
	Pc40090
	Pc35925
	Pc14513
	Pc16727
	Pc21642
	Pc34203
	Pc35147
	Pc29450
	Pc33191
	Pc46211
	Pc46752
	Pc29808
	Pc2072
	Pc33419
	Pc17654
	Pc25141
	Pc40145
	Pc32969
	Pc28380
	Pc29195
	Pc14980
	Pc39767
	Pc35842
	Pc23100
	Pc28109
YABBY	Pc17647
	Pc32684
	Pc31529
	Pc42715
	Pc27195
	Pc30623
	Pc38500
	Pc50019
	Pc32696
	Pc17075
	Pc14296
	Pc26876
ZF-HD	Pc4868
	Pc24418
	Pc31549
	Pc17636
	Pc13896
	Pc35710
	Pc392
	Pc1028
	Pc49607
	Pc36243
ZIM	Pc26061
	Pc42617
	Pc28926
	Pc16949
	Pc25018
	Pc40318
	Pc38152
	Pc43808
	Pc33928
	Pc39494
	Pc9765
